# Supplementary material for: Integrating Genetic and Chromosome Maps of Allium Cepa: From Markers Visualization to Genome Assembly Verification
Source: Preprints.org preprint supplement (doi:10.20944/preprints202208.0241.v1), 2022-08-12
Supplement: Supplementary file 1 [file Supplementary_Figures_S1-S11.pdf › Supplementary_Figures_S1-S11.pdf]

## Supplementary figures S1-S11

### Chromosome 2

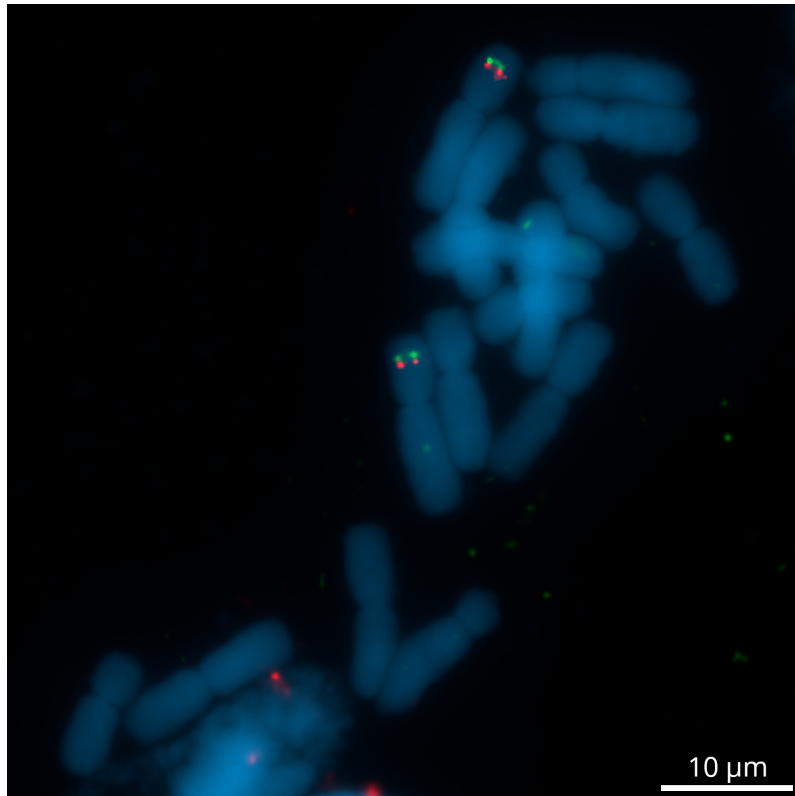

**Figure S1.** Dual-color Tyr-FISH on mitotic metaphase chromosome 2 of *Allium cepa* probing with Unigene572 (red) and CL5148.Contig1 (green). Scale bar - 10 μm.

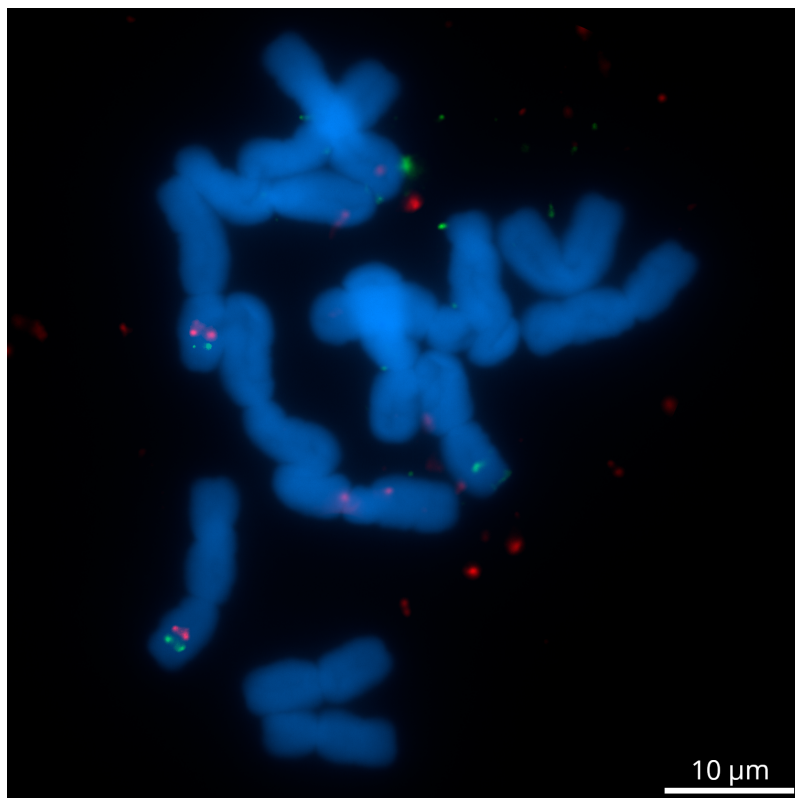

**Figure S2.** Dual-color Tyr-FISH on mitotic metaphase chromosome 2 of *Allium cepa* probing with CL4449.Contig1 (red) and Unigene10061 (green). Scale bar - 10 μm.

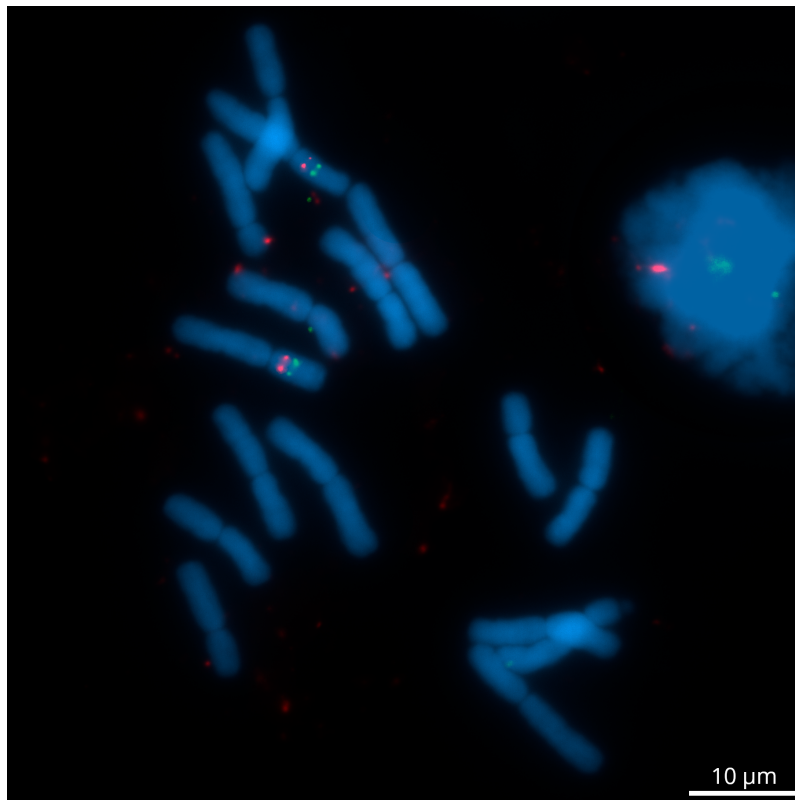

**Figure S3.** Dual-color Tyr-FISH on mitotic metaphase chromosome 2 of *Allium cepa* probing with Unigene27326 (red) and Unigene25645 (green). Scale bar - 10 μm.

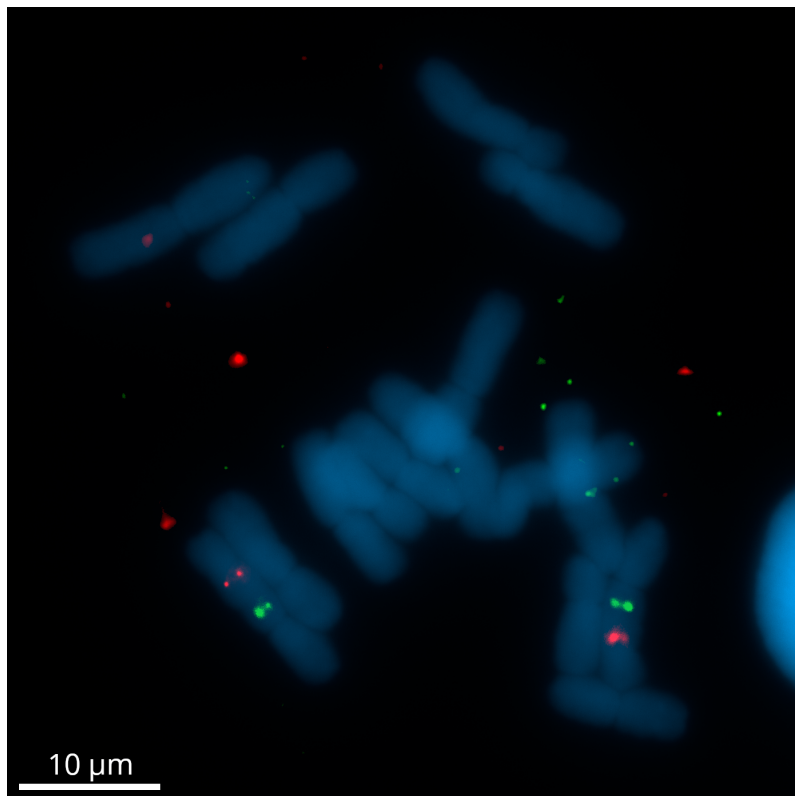

**Figure S4.** Dual-color Tyr-FISH on mitotic metaphase chromosome 2 of *Allium cepa* probing with Unigene5305 (red) and Unigene28713 (green). Scale bar - 10 μm.

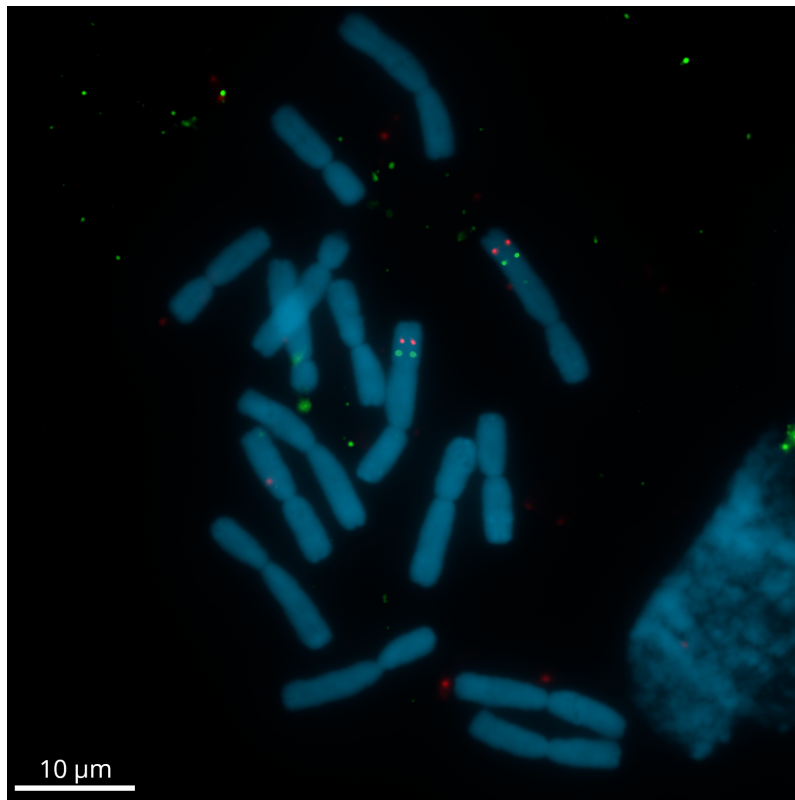

**Figure S5.** Dual-color Tyr-FISH on mitotic metaphase chromosome 2 of *Allium cepa* probing with Unigene23418 (red) and Unigene10683 (green). Scale bar - 10 μm.

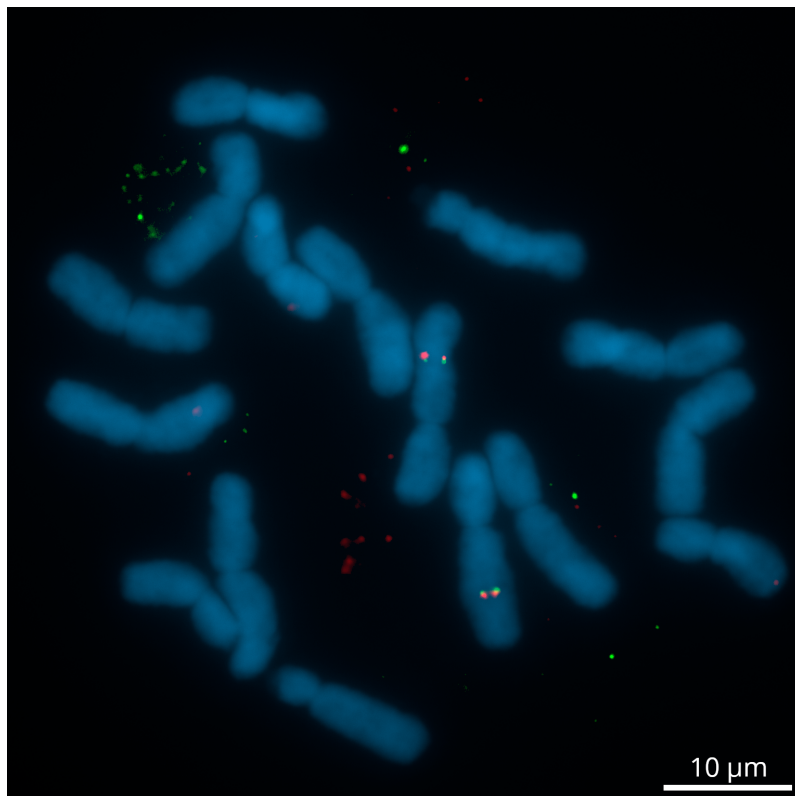

**Figure S6.** Dual-color Tyr-FISH on mitotic metaphase chromosome 2 of *Allium cepa* probing with *mlh1* gene (red) and Unigene5305 (green). Scale bar - 10 μm.

## Chromosome 6

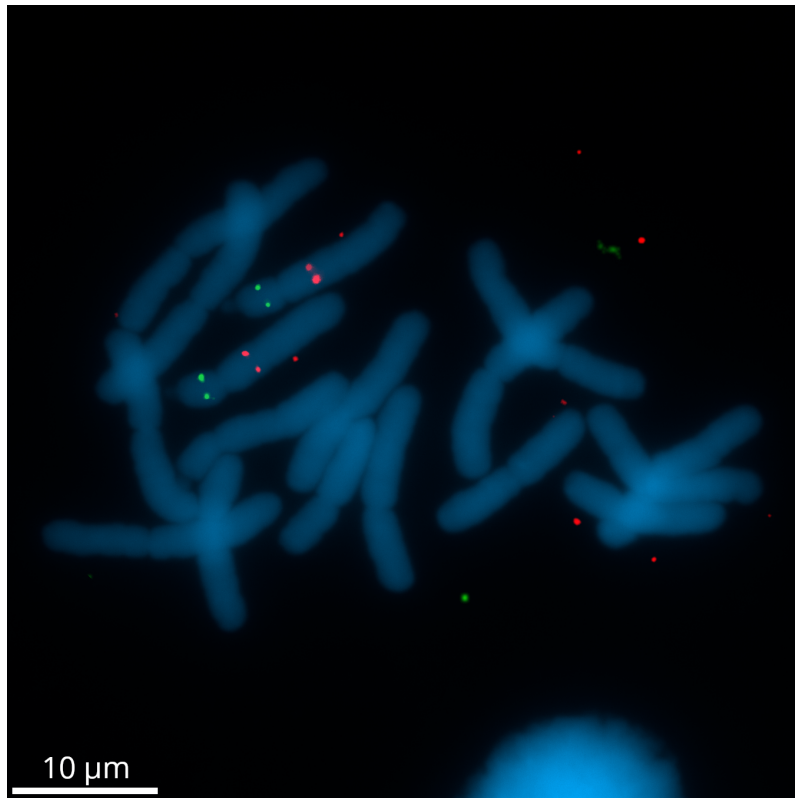

**Figure S7.** Dual-color Tyr-FISH on mitotic metaphase chromosome 6 of *Allium cepa* probing with Unigene13863 (red) and Unigene7941 (green). Scale bar - 10 μm.

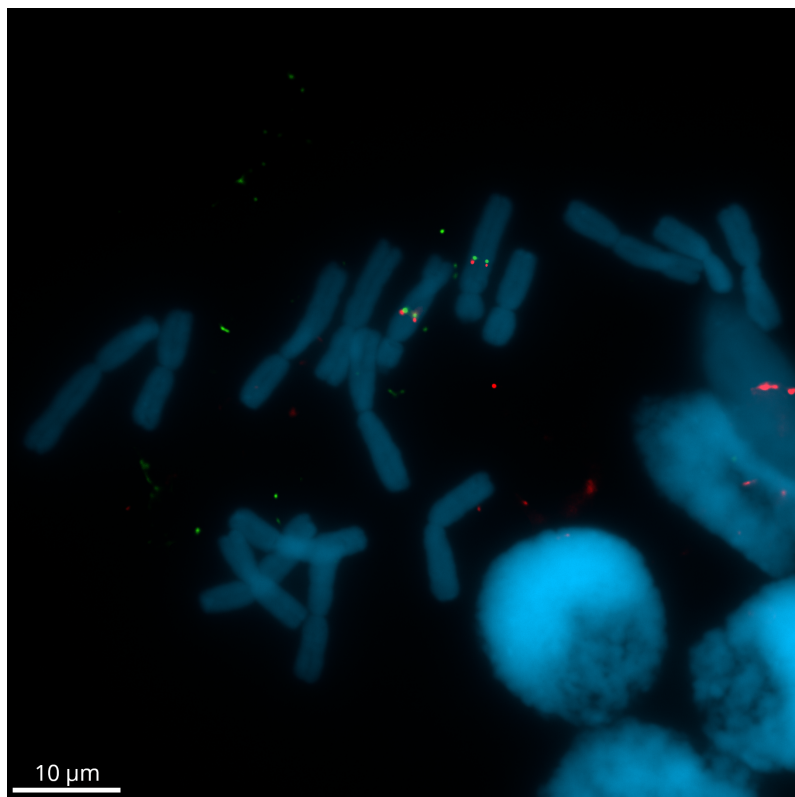

**Figure S8.** Dual-color Tyr-FISH on mitotic metaphase chromosome 6 of *Allium cepa* probing with Unigene49 (red) and CL4877.Contig2 (green). Scale bar - 10 μm.



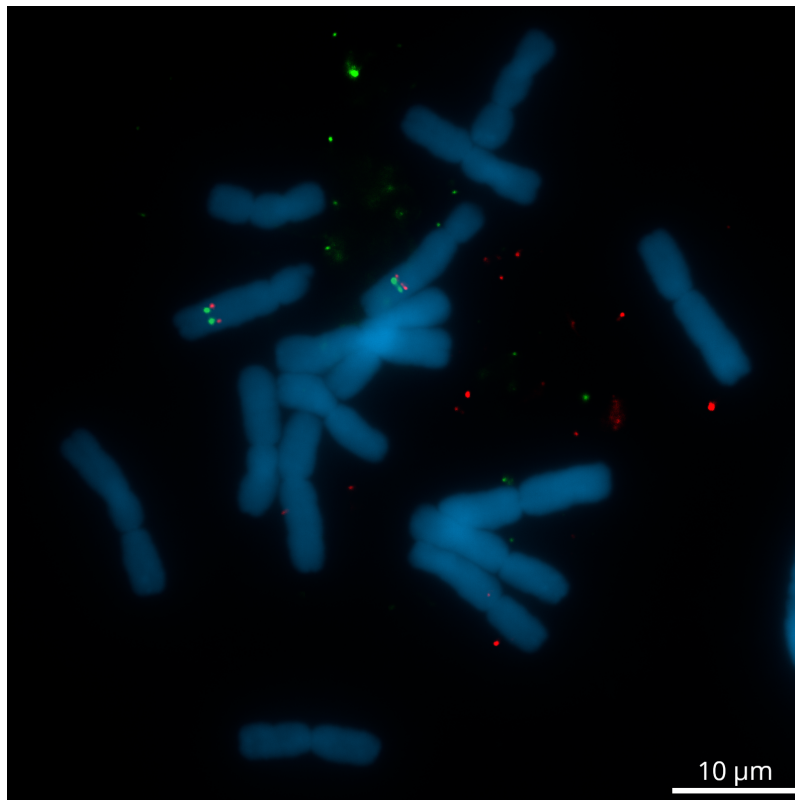

**Figure S9.** Dual-color Tyr-FISH on mitotic metaphase chromosome 6 of *Allium cepa* probing with Unigene22659 (red) and Unigene10558 (green). Scale bar - 10 μm.

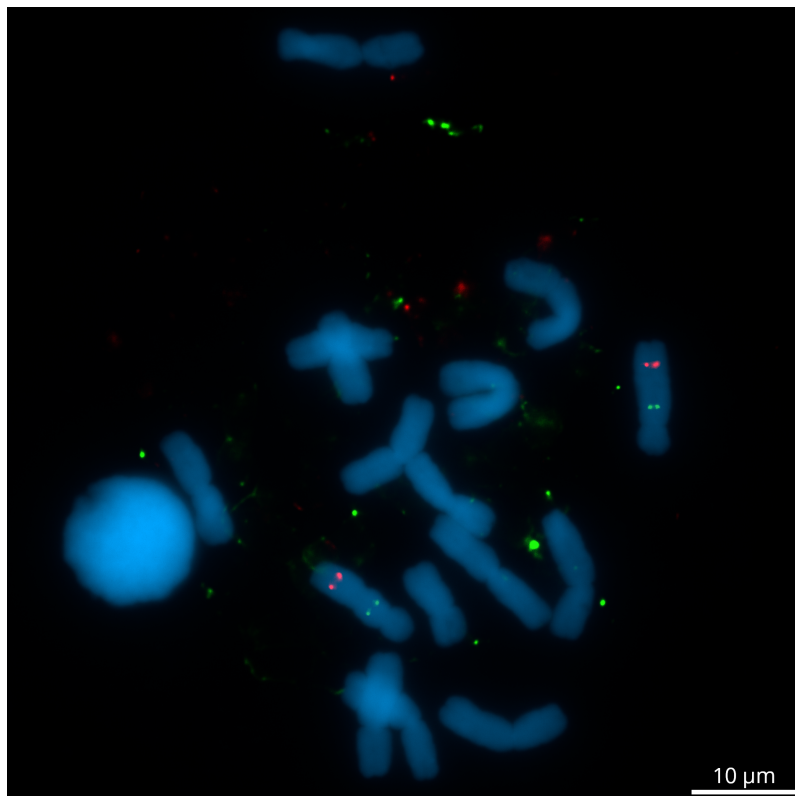

**Figure S10.** Dual-color Tyr-FISH on mitotic metaphase chromosome 6 of *Allium cepa* probing with Unigene28149 (red) and CL39.Contig3 (green). Scale bar - 10 μm.

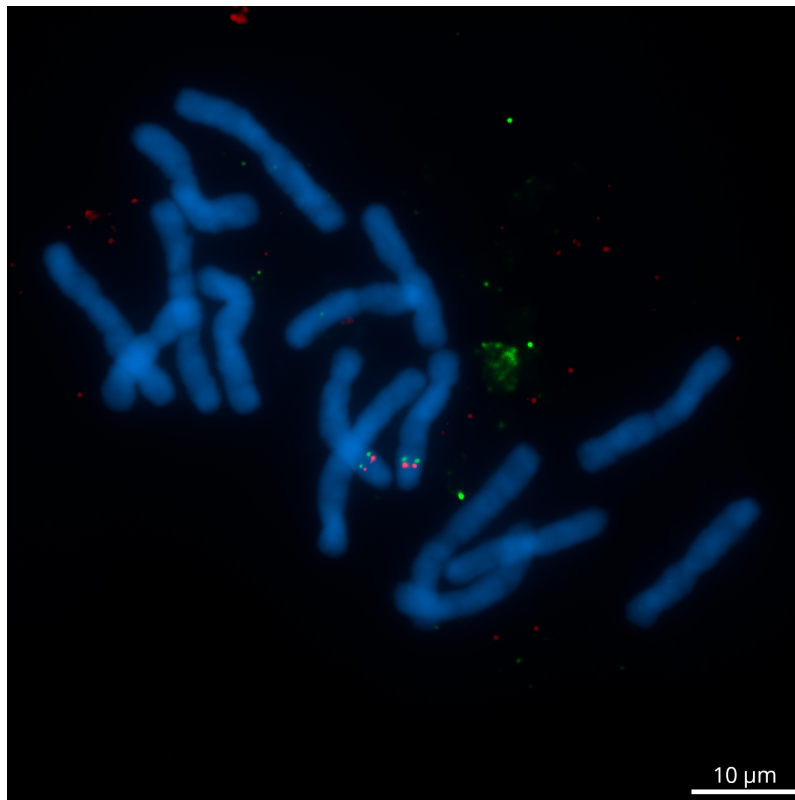

**Figure S11.** Dual-color Tyr-FISH on mitotic metaphase chromosome 6 of *Allium cepa* probing with Unigene8201 (red) and Unigene28149 (green). Scale bar - 10 μm.
