# Supplementary material for: Integrating Genetic and Chromosome Maps of Allium Cepa: From Markers Visualization to Genome Assembly Verification
Source: Preprints.org preprint supplement (doi:10.20944/preprints202208.0241.v1), 2022-08-12
Supplement: Supplementary file 1 [file Supplementary_Table1.xlsx]

## Sheet: Chromosome 2
Marker / gene name	Allium cepa TSA database ID	Transcript annotation	Location in genetic map, cM	Physical location, % of fractional length	Location in Chr2 genomic scaffold (Finkers et al., 2021), Mbp	Probe length, bp	Forward primer	Reverse primer
Unigene23526	GAAN01015867.1	Translation initiation factor IF-2, chloroplastic	9.0	6.5	17	1772	AGCGATTAGGCATGCTCTCC	GCCTCCCACTCCATGAAGTC
Unigene10061	GEOY01094634.1	B-box zinc finger protein 24	14.7	10.9	41	1650	CATCGCAGTCACGACAAAACA	GCAGATGAGGCTGCACTATGT
CL5148.Contig1	GBRQ01021208.1	Sugar transport protein MST3	10.0	11.1	19	1294	AGTGTGCCACTGACCTTGTT	TGTGTCGGGTAGGACTAGGG
Unigene572	GBRO01003241.1	Malate dehydrogenase [NADP]	14.2	12.9	32	2801	AGTGGTGCAGTTCTTCAGCA	AACCGATTGGCAGGGAAGTT
Unigene28076	GBJZ01155814.1	ADP-ribosylation factor 3	5.9	13.4	6	1465	AAAAGTCCTGGCAGCCATCA	ACTGTTCTGGACGCAAGAGG
CL4449.Contig1	GFAK01070907.1	N-(5'-phosphoribosyl)anthranilate isomerase 1, chloroplastic	23.7	18.3	45	1231	ACACGTGCTTGACCGATCAT	TAAGCGCCACACTGCACATA
Unigene25645	GBRQ01070869.1	Probable serine/threonine-protein kinase At1g01540	27.4	19.1	51	1118	CCCTGCTCTCTACCAACCCT	TGATGTTGGGCCAGTCAGTC
Unigene27326	GBRO01063745.1	Glycerol-3-phosphate 2-O-acyltransferase 4	30.5	25.8	58	1008	TTCTCGTAAGGTTGGTGCAT	CATTGCCCCAATGTCCACAC
Unigene28713	GBRQ01035203.1	Heme oxygenase 1, chloroplastic	42.0	40.3	70	1323	GCTGCACGCAGAGCTTTTAG	CGTAAGGCGCACGAAACAAT
Unigene5305	GAAO01006838.1	Photosystem I chlorophyll a/b-binding protein 6, chloroplastic	99.5	69.1	231	1627	TGTTTCACAAACGCTTCGTCC	TGTCGCCACCACTCATTCAA
mlh1	GBRO01051308.1	DNA mismatch repair protein MLH1	-	70.6	233	1349	TTGTTCACCTCTACCCGTGC	GTTGTCCGACTCGCCCTAAA
Unigene10683	GFAK01037365.1	D-glycerate 3-kinase, chloroplastic	106.9	79.9	274	1160	TTTGACTCCTCAGGTTGGCC	GCCCATACAAGCAACTTCGC
Unigene23418	GHMJ01139820.1	Probable metal-nicotianamine transporter YSL6	111.1	88.7	326	1368	GGGTTGTCGTCATCGTCACT	CCAAACCAGCCCATACCGAT

## Sheet: Chromosome 6
Marker / gene name	Allium cepa TSA database ID	Transcript annotation	Location in genetic map, cM	Physical location, % of fractional length	Location in Chr2 genomic scaffold (Finkers et al., 2021), Mbp	Probe length, bp	Forward primer	Reverse primer
CL6133.Contig1	GBRQ01042564.1	Probable protein phosphatase 2C 34	106.7	10.1	7	1018	CCATCATCCGAAGCTGTTGC	GTTTTTCGACGGGTGCCAAA
Unigene13813	GBRQ01000382.1	Protein argonaute 4A	101.5	9.2	21	3809	TGCGCATAGCAAATTGGAGC	AGTAATGGGGATTGCGAGGC
Unigene7941	GEOY01011205.1	Ribosome biogenesis protein NOP53	90.0	14.0	37	2286	CCACTCCGAACGACAGGAAA	TTTCCGCAACGAAGATGGGA
Unigene13863	GHMJ01162907.1	CTP synthase	67.4	41.8	87	1084	TTGGCATGCAAACTGCTGTC	GGCCAGCACTTTCAAGCTTC
CL4877.Contig2	GBRN01014813.1	Vesicle transport v-SNARE 13	59.1	48.9	104	1180	TGGTCAGTGGTCACAGCAAA	GAGCGGTAGAGGGACGAATG
Unigene49	GEOY01077179.1	Transcription factor BIM2	57.5	46.0	125	1110	CTAAGTCCTTGGGCAGCCAA	CCCTAGGCGGCGGATTTAAT
Unigene10558	GAAN01018254.1	Protein YLS7	36.5	71.0	262	1143	ACTCGGATGCCCATCATGTC	AAACCCTGGCTTTTGTTGGC
Unigene22659	GBRQ01102740.1	Cysteine synthase, chloroplastic/chromoplastic	31.3	69.2	189	1457	TCTCTCCCAAGCTCTCTCCC	TGGTACAAGCGGCCATTGAT
CL39.Contig3	GBRQ01015548.1	Protein ACTIVITY OF BC1 COMPLEX KINASE 8, chloroplastic	18.7	38.4	87	1044	ACTGTTGGGCACAAGGTCAT	GCGCCTCAGATCTCTTGGAA
Unigene28149	GBRN01015472.1	Mitochondrial uncoupling protein 1	13.5	78.7	241	1236	CGGTTGACTGTTTCGTGCAG	TCCGTTCTCAAGTGCACTCC
Unigene8201	GEOY01067601.1	Ribosomal RNA small subunit methyltransferase nep-1	10.9	83.6	272	3866	TGAACTCGGATGATCATGCCA	ACCAGCGACTTCTCGAGATC
